# Supplementary material
Source: publisher figshare collection journal article supplement (https://karger.figshare.com/articles/dataset/_/5125507)
Supplement: Supplementary file 1 [file 1]

Table S1 MiRNAs differentially expressed in the HepG2 cells before and after paclitaxel therapy.

| miRNA Name            | Chromosome location | Fold-change | Average FDR |
|-----------------------|---------------------|-------------|-------------|
| <b>Down-regulated</b> |                     |             |             |
| hsa-miR-3675-5p       | 1p36.13             | -5.57       | 0.03203     |
| hsa-miR-1246          | 2q31.1              | -4.82       | 1.43E-08    |
| hsa-let-7b            | 22q13.3             | -3.34       | 0.00036     |
| hsa-miR-185*          | 22q11.21            | -3.25       | 0.04955     |
| hsa-miR-1290          | 1p36.13             | -3.22       | 0.00068     |
| hsa-miR-593           | 7q32.1              | -2.77       | 0.01291     |
| hsa-miR-1255b         | 5p13.1              | -2.46       | 0.02964     |
| hsa-miR-194           | 1q41                | -2.31       | 0.03725     |
| hsa-miR-1225-3p       | 16p13.3             | -2.30       | 0.04232     |
| hsa-miR-1268          | 15q11.2             | -2.26       | 0.02151     |
| hsa-miR-9             | 11q13.1             | -2.18       | 0.04575     |
| hsa-miR-548j          | 22q12.1             | -2.16       | 0.04473     |
| hsa-miR-624*          | 14q12               | -2.11       | 0.03143     |
| <b>Up-regulated</b>   |                     |             |             |
| hsa-miR-877           | 6p21.33             | 4.61        | 1.93E-05    |
| hsa-miR-374a          | Xq13.2              | 4.24        | 0.00238     |
| hsa-miR-1260          | 14q24.3             | 3.58        | 0.00029     |
| hsa-miR-1253          | 17p13.3             | 3.42        | 0.02161     |
| hsa-miR-183*          | 7q32.2              | 3.36        | 8.86E-05    |
| hsa-miR-301a          | 17q22               | 3.34        | 0.00771     |
| hsa-miR-508-5p        | 9q22.31             | 3.16        | 0.01827     |
| hsa-miR-491-3p        | Xq27.3              | 3.14        | 0.00274     |
| hsa-miR-4291          | 9p23.1              | 3.19        | 0.00639     |
| hsa-miR-1260b         | 11q21               | 3.09        | 0.00051     |
| hsa-miR-509-5p        | Xq27.3              | 2.99        | 0.00573     |
| hsa-miR-2054          | 4q28.1              | 2.95        | 0.0383      |
| hsa-miR-1280          | 3q21.3              | 2.90        | 1.25E-06    |
| hsa-miR-20b           | 13q31.3             | 2.83        | 0.00017     |
| hsa-miR-19b           | 13q31.3             | 2.79        | 8.77E-05    |
| hsa-miR-21            | 17q22               | 2.79        | 5.54E-06    |
| hsa-miR-221*          | Xp11.3              | 2.73        | 0.03331     |
| hsa-miR-210           | 11p15.1             | 2.72        | 0.00015     |
| hsa-miR-20a           | 13q31.3             | 2.70        | 0.00069     |
| hsa-miR-101           | 1p31.3              | 2.63        | 0.00458     |
| hsa-miR-19a           | 13q31.3             | 2.58        | 0.00029     |
| hsa-miR-1274a         | 5p13.1              | 2.49        | 0.00107     |
| hsa-miR-451           | Xp22.12             | 2.46        | 0.00395     |
| hsa-miR-23c           | 5p13.1              | 2.46        | 0.00254     |
| hsa-miR-492           | 12q22               | 2.41        | 0.03395     |
| hsa-miR-106a          | Xq26.2              | 2.38        | 0.00352     |
| hsa-miR-3135          | 3p24.3              | 2.36        | 0.04551     |
| hsa-miR-548p          | 6q12.2              | 2.25        | 0.02413     |
| hsa-miR-206           | 5p21.1              | 2.25        | 0.04346     |
| hsa-miR-100           | 11q24.1             | 2.21        | 0.00080     |
| hsa-miR-3659          | 1p34.3              | 2.21        | 0.03806     |
| hsa-miR-3646          | 10q23.3             | 2.20        | 0.00566     |
| hsa-miR-107           | 13q31.3             | 2.20        | 0.00778     |
| hsa-miR-17            | 20q13.12            | 2.20        | 0.00249     |
| hsa-let-7f-1*         | 9q22.33             | 2.12        | 0.00061     |
| hsa-miR-27b           | 19p13.13            | 2.11        | 0.00833     |
| hsa-miR-24-2*         | 9q22.32             | 2.11        | 0.00126     |
| hsa-miR-4289          | 9q22.32             | 2.05        | 0.00403     |
| hsa-let-7f            | 9q22.1              | 2.05        | 4.98E-05    |
| hsa-miR-18b           | Xq26.2              | 2.03        | 0.00352     |
| hsa-miR-208a          | 14q11.2             | 2.02        | 0.04378     |

Note: All experiments were performed in quadruplicate. A P-value <0.05 was considered statically significant.

Table S2 IPA Network analysis.

| Network | Molecules in Network                                                                                                                                                                                                                                                                                   | Focus Molecules | Top Functions                                                                       |
|---------|--------------------------------------------------------------------------------------------------------------------------------------------------------------------------------------------------------------------------------------------------------------------------------------------------------|-----------------|-------------------------------------------------------------------------------------|
| 1       | let-7, let-7a/let-7f/let-7c, let-7f-1*/let-7b*/let-7a*, mir-24, mir-99, miR-194, mir-194, miR-451, miR-492, mir-548, miR-1290, miR-100/miR-99a/miR-99b, miR-19b/miR-19a, miR-208b/miR-208b-3p/miR-208, miR-23b/miR-23a/miR-23c, miR-210, miR-548p, miR-548h/miR-548i/miR-548d-5p, miR-24-1*/miR-24-2*, | 14              | Inflammatory Disease, Renal Nephritis, Renal and Urological Disease                 |
| 2       | miR-9, mir-9, mir-101, mir-103, mir-221, miR-1/miR-206/miR-1a, miR-101/miR-101a/miR-101b, miR-103/miR-103a/miR-107, miR-130a/miR-130b/miR-301a, miR-18a/miR-18b/miR-4735-3p, miR-19b/miR-19a, miR-20a/miR-106b/miR-17-5p, miR-21/miR-590-5p, miR-210, miR-221*, miR-27b/miR-27a                        | 12              | Reproductive System Disease, Connective Tissue Disorders, Genetic Disorder          |
| 3       | mir-1225, miR-1225-3p, mir-183, miR-183*, mir-185, miR-185*, mir-491, miR-491-3p/miR-491*                                                                                                                                                                                                              | 4               | Cancer, Reproductive System Disease, Skeletal and Muscular Disorders and Cell Death |
| 4       | mir-506, miR-509-5p/miR-4418/miR-509-3-5p, miR-509-5p/miR-508-5p                                                                                                                                                                                                                                       | 2               | Cellular Assembly and Organization, Genetic Disorder, Neurological Disease          |

The top four networks and their functions are shown with the associated miRNAs.
